# Supplementary material
Source: publisher figshare collection journal article supplement (https://gsapubs.figshare.com/ndownloader/files/23320952)
Supplement: Supplementary file 1 [file 23320952]

## Sheet: Sample location
GSA Data Repository Item 2020202 accompanies Sierra-Rojas, M.I., Lawton, T.F., Martens, U., von Quadt, A., Beltran Triviño, A.,
Coombs, H., and Stockli, D.F., 2020, Early Cretaceous to Paleogene sandstone provenance and sediment-dispersal systems of the Cuicateco
terrane, Mexico, in Martens, U., and Molina Garza, R.S., eds., Southern and Central Mexico: Basement Framework, Tectonic Evolution, and
Provenance of Mesozoic–Cenozoic Basins: Geological Society of America Special Paper 546,,https://doi.org/10.1130/2020.2546(10).
Appendix DR1
Sample	Unit	Sample code	Latitud	Longitud	Datum	Analysis	Area
Ch7	Chivillas	17Apr16-2A	18.5849	-97.2456	WGS84	PC	Northern
Ch8	Chivillas	17Apr16-3A	18.5859	-97.2491	WGS84	PC	Northern
Ch10	Chivillas	14Apr16-6A	18.1666	-96.9977	WGS84	PC	Central
Ch9	Chivillas	17Apr16-3C	18.5859	-97.2491	WGS84	PC	Northern
Ch11	Chivillas	14Apr16-8A	18.169	-96.933	WGS84	PC	Central
Ch12	Chivillas	14Apr16-4F	18.186	-97.0229	WGS84	PC	Southern
Ch13	Chivillas	14Apr16-2A	18.1861	-97.0453	WGS84	PC	Central
Ch14	Jaltepetongo	26Feb16-4A	17.1892	-96.6437	WGS84	PC	Southern
Tec1	Tecamalucan	18Apr16-3A	18.7527	-97.2173	WGS84	PC	Northern
Tec2	Tecamalucan	18Apr16-4C	18.7519	-97.2081	WGS84	PC	Northern
Vel2	Velasco	15Apr16-5A	18.0464	-96.7148	WGS84	PC	Eastern
Vel2	Velasco	15Apr16-5G	18.0464	-96.7148	WGS84	PC	Eastern
PC		Point Counts

## Sheet: Point Counts
		Ch7	Ch8	Ch9	Ch10	Ch11	Ch12	Ch13	Ch14	Tec1	Tec2	Vel2A	Vel2B
Symbol	Definition	Points	Points	Points	Points	Points	Points	Points	Points	Points	Points	Points	Points
Qm	Monocrystalline quartz	128	65	76	169	124	111	134	140	62	74	171	181
Qpq	Polycrystalline quartz	50	68	52	50	54	21	74	40	50	60	41	75
Qc	Chert			38	30	0	30	0	0	0	0	16	0
K	Potassium feldspar, myrmekitic grains	10	4	42	0	45	100	33	62	50	0	33	0
P	Plagioclase feldspar	232	324	178	199	98	155	131	165	164	243	135	95
Lmf	Foliated quartz-mica metamorphic grains	19	8	13	8	16	17	0	20	27	15	20	27
Lmp	Polugonal quartz-mica metamorphic grains, Schists	4	9	28	3	0	50	58	29	24	30	15	37
Lmv	metavolcanic grains with epidote and/or chlorite			0	0	0	0	0	0	0	0	0	0
Lss	Sedimentary lithic grains: siltstone, argillite, sandstone	11	17	2	9	30	0	11	0	0	0	5	0
Lsc	Detrital carbonate grains (=CE from Zuffa, 1980)			10	0	0	0	0	0	106	50	0	18
Lvf	Felsitic volcanic lithic grains	16	2	48	32	83	9	28	21	17	28	36	67
Lvl	Lathwork volcanic lithic grains			0	0	50	7	16	0	0	0	28	0
Lvm	Microlitic volcanic lithic grains	30	3	0	0	0	0	15	0	0	0	0	0
Lvt	Tuffaceous and vitric volcanic lithic grains			13	0	0	0	0	23	0	0	0	0
accesory	Zircon, tourmaline, apatite, titanite, mica, magnetite.	29	18	10		17	24	1	4	3		11	6
	TOTAL	500	500	500	500	500	500	500	500	500	500	500	500
	Recalculated Parameters
Qt	Total quartzose grains (= Qm + Qpq + Qc)	178	133	166	249	178	162	208	180	112	134	228	256
F	Total feldspar (= K + P)	242	328	220	199	143	255	164	227	214	243	168	95
Lm	Total metamorphic grains (= Lmf + Lmp + Lmv)	23	17	41	11	16	67	58	49	51	45	35	64
Lv	Total volcanic grains (+ Lvf + Lvl + Lvm + Lvt)	46	5	61	32	133	16	59	44	17	28	64	67
Ls	Total sedimentary grains (+ Lss + Lsc)	11	17	12	9	30	0	11	0	106	50	5	18
L	Total unstable lithic grains (+ Lm + Lv + Ls)	80	39	114	52	179	83	128	93	174	123	104	149
Qp	Total polycrystalline quartz (= Qpq + Qc)	50	68	90	80	54	51	74	40	50	60	57	75
Lt	Total lithic grains (= L + Qp)	130	107	204	132	233	134	202	133	224	183	161	224

## Sheet: Triangular Plots
	QtFL%Q	QtFL%F	QtFL%L	QmFLt%Qm	QmFLt%F	QmFLt%Lt	LmLvLs%Lm	LmLvLs%Lv	LmLvLs%Ls	P/F
Ch7	35.6	48.4	16	25.6	48.4	26	28.75	57.5	13.75	0.958678
Ch8	26.6	65.6	7.8	13	65.6	21.4	43.5897	12.8205	43.5897	0.987805
Ch10	49.8	39.8	10.4	33.8	39.8	26.4	21.1538	61.5385	17.3077	1
Ch9	33.2	44	22.8	15.2	44	40.8	35.9649	53.5088	10.5263	0.809091
Ch11	35.6	28.6	35.8	24.8	28.6	46.6	8.93855	74.3017	16.7598	0.685315
Ch12	32.4	51	16.6	22.2	51	26.8	80.7229	19.2771	0	0.607843
Ch13	41.6	32.8	25.6	26.8	32.8	40.4	45.3125	46.0938	8.59375	0.79878
Ch14	36	45.4	18.6	28	45.4	26.6	52.6882	47.3118	0	0.726872
Vel2A	45.6	33.6	20.8	34.2	33.6	32.2	33.6538	61.5385	4.80769	0.803571
Vel2B	51.2	19	29.8	36.2	19	44.8	42.953	44.9664	12.0805	1
Tec1	22.4	42.8	34.8	12.4	42.8	44.8	29.3103	9.77011	60.9195	0.766355
Tec2	26.8	48.6	24.6	14.8	48.6	36.6	36.5854	22.7642	40.6504	1
